# Supplementary material for: Dietary Nitrate Protects Against Skin Flap Ischemia-Reperfusion Injury in Rats via Modulation of Antioxidative Action and Reduction of Inflammatory Responses
Source: PubMed Central journal article supplement (PMC6987438; doi:10.3389/fphar.2019.01605), 2020-01-22
Supplement: Image_1.pdf [file Image_1.pdf]

## Supplementary Figure

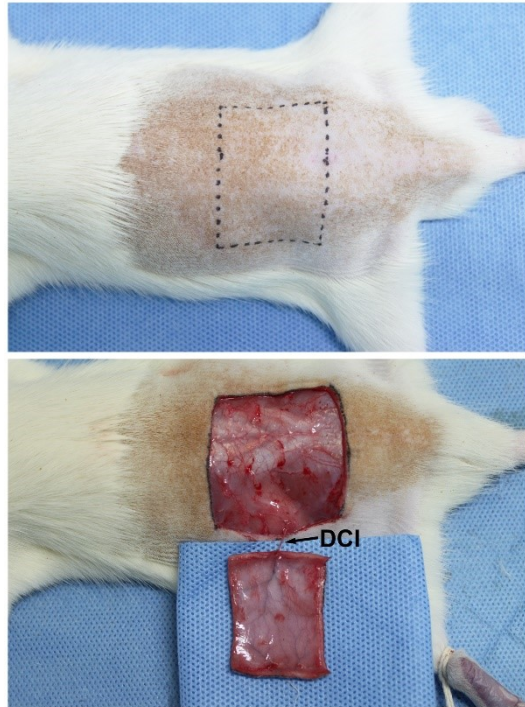

Supplemental Figure 1. Design of the flap based on the left deep circumflex iliac vessels (DCI). A dorsal rectangular flap (3×4 cm in size) was elevated, retaining only the DCI as the vascular pedicle. DCI, deep circumflex iliac vessel.
